# Supplementary material for: Plant Species-Dependent Increased Abundance and Diversity of IncP-1 Plasmids in the Rhizosphere: New Insights Into Their Role and Ecology
Source: PubMed Central journal article supplement (PMC7728920; doi:10.3389/fmicb.2020.590776), 2020-11-27
Supplement: Data_Sheet_1.pdf [file Data_Sheet_1.pdf]

## *Supplementary Material*

# **Plant species-dependent increased abundance and diversity of IncP-1 plasmids in the rhizosphere – new insights into their role and ecology**

Masaki Shintani, Eman Nour, Tarek Elsayed, Khald Blau, Inessa Wall, Sven Jechalke, Cathrin Spröer, Boyke Bunk, Jörg Overmann Kornelia Smalla

### **Corresponding author:**

Professor Dr. Kornelia Smalla [kornelia.smalla@julius-kuehn.de](mailto:kornelia.smalla@julius-kuehn.de)

### **The Supplementary information includes**

- ✓ Supplemental text
- ✓ Figures S1-S5
- ✓ Tables S1-S3

## Supplemental text

### Closer sequence comparison of Tn501 and insertion sites of IS1071

In two of the plasmids, pTK9 and pTL9, Tn501 seems to be intact while in pTL52 and pTL21, the IS1071 was inserted into the *tnpA<sub>Tn501</sub>* gene (labeled as\* in Fig. 4A). In three plasmids, pTL16, pTL25, and pTT11, the *tnpA<sub>Tn501</sub>* gene was truncated with IS1071, and notably, the insertion sites of IS1071 were identical in those plasmids (Fig. 4A). Three of the Tn501 carrying IncP-1 $\beta$ 1 plasmids, pTT11, pTL21 and pTL52 seemed to be similar in size (53,011-53,601 bp). They all carried a Tn501 linked to a complete *mer* operon and the differences among these plasmids were mainly due to the frame shift of *tnpA<sub>IS1071</sub>* and to the truncation of *tnpA<sub>Tn501</sub>* (Fig. 4A, Fig. S3). In pTL52 and in pTL21, the *tnpA<sub>Tn501</sub>* was complete but interrupted through the insertion of IS1071, while in pTT11 the IS1071 was inserted at the end of the truncated *tnpA<sub>Tn501</sub>* (Fig. 4A). Exactly this was also observed for the sequence of pTL16 (Fig. 4A), which is larger in size (59,989 bp) due to the carriage of an additional MGE (Fig. 3A, Fig. S3). Similarly, the IS1071 was inserted into the 3' end of the truncated *tnpA<sub>Tn501</sub>* in pTL25 (102,276 bp) (Fig. 4A), which carried additional MGEs (Fig. 3A, Fig. S3). Both plasmids with an intact- and likely-active Tn501 contained accessory metabolic genes either between *trfA* and *oriV*, which was downstream of *tnpA<sub>Tn501</sub>* linked to IS1071 (pTK9) or between *traC* and *parA* (pTL9) (Fig. 3A, Fig. S3).

### Exogenous isolation of plasmid pBB55 by biparental mating

Capturing tetracycline resistance-conferring conjugative plasmids was attempted from sandy soil and lettuce rhizosphere that were untreated, manure-treated, and treated with manure supplemented with doxycycline (50 and 100 mg/kg soil dry weight). Bacterial fractions of bulk soil and lettuce rhizosphere were prepared as described in the study of Blau et al. (2019). The filter mating assay using *Pseudomonas putida* KT2442 (*gfp*-tagged, kanamycin and rifampicin resistant) was done according to Wolters et al. (2015). Tetracycline resistant transconjugants were only captured from bulk soil amended with manure containing doxycycline (50 mg/kg soil dry weight). The transfer frequency of tetracycline resistant transconjugants was  $1.59 \times 10^{-6}$  (ratio colony forming units of transconjugants and recipient). Forty transconjugants were picked for further analysis. All transconjugants carried identical plasmids as revealed by restriction digestion analysis and one, plasmid pBB55, was selected for sequencing.

### Assembly of pTL21 and pTL21\*

Eight contigs (716 - 116,849 bp) were found for the first assembly of pTL21, and six of them showed 99-100% identities with the chromosomal DNA of *Ralstonia eutropha* JMP134, which is a closely related strain of the recipient, *Cupriavidus necator* JMP228. One of the other two contained *gfp* and streptomycin and gentamycin resistance genes indicating that it was a fragment of pSM1890, a mobilizable plasmid. The last one contig (117 kb) carried two IncP-1 plasmid backbone regions involved in plasmid replication, maintenance and conjugative transfer, two *mer* genes. Putative naphthalene degradative genes, *nagR*, *nagABCDEFGHIJKLM*, and *nagQ*, were also found, which were flanked by two copies of IS1071 on it. Because the DNA region containing one of *mer* genes

and the *nag* gene cluster showed much lower read coverage in the contig, two contigs were reassembled with raw reads data. In conclusion, there were two kinds of plasmids, i.e., *nag* gene-containing plasmid (pTL21\*, 81,088 bp) and *nag* gene-free plasmid (pTL21, 53,599 bp), while both shared the same plasmid backbones (Figure S4).

## References

Blau, K., Jacquioid, S., Sørensen, S. J., Su, J.-Q., Zhu, Y.-G., Smalla, K., et al. (2019). Manure and doxycycline affect the bacterial community and its resistome in lettuce rhizosphere and bulk soil. *Front Microbiol* 10, 725.

Wolters, B., Kyselková, M., Krögerrecklenfort, E., Kreuzig, R., and Smalla, K. (2015). Transferable antibiotic resistance plasmids from biogas plant digestates often belong to the IncP-1 $\epsilon$  subgroup. *Front Microbiol* 5, 765.

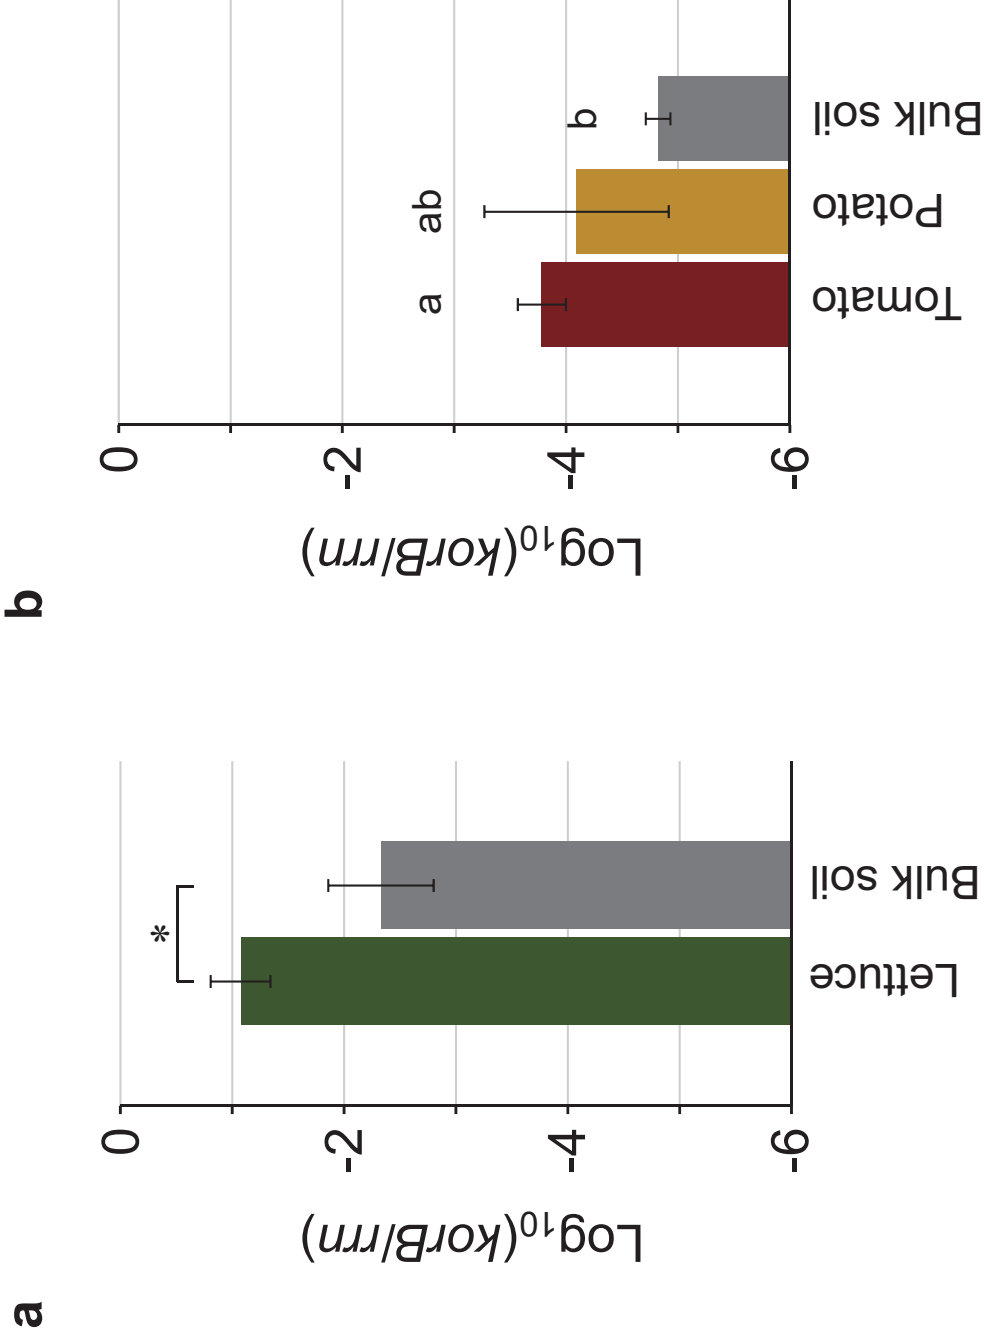

**Fig. S1.** Relative abundance of IncP-1 plasmids  $\log_{10}(\textit{korB/rrn})$  in total community DNA (TC-DNA) from the rhizosphere of lettuce and bulk soil in Experiment I (**a**), and those of tomato, potato plants and bulk soils in Experiment II (**b**). ‘\*\*’ indicates the significant differences ( $t$  test,  $p < 0.01$ ) in panel **a**. ‘a’ and ‘b’ indicate the significant differences (Tukey HSD test,  $p < 0.05$ ,  $n = 4$ ). ‘ab’ indicates that significant differences were detected between the results of tomato and bulk soil, but however, not between those of tomato and potato, or between those of potato and bulk soil in panel **b**.

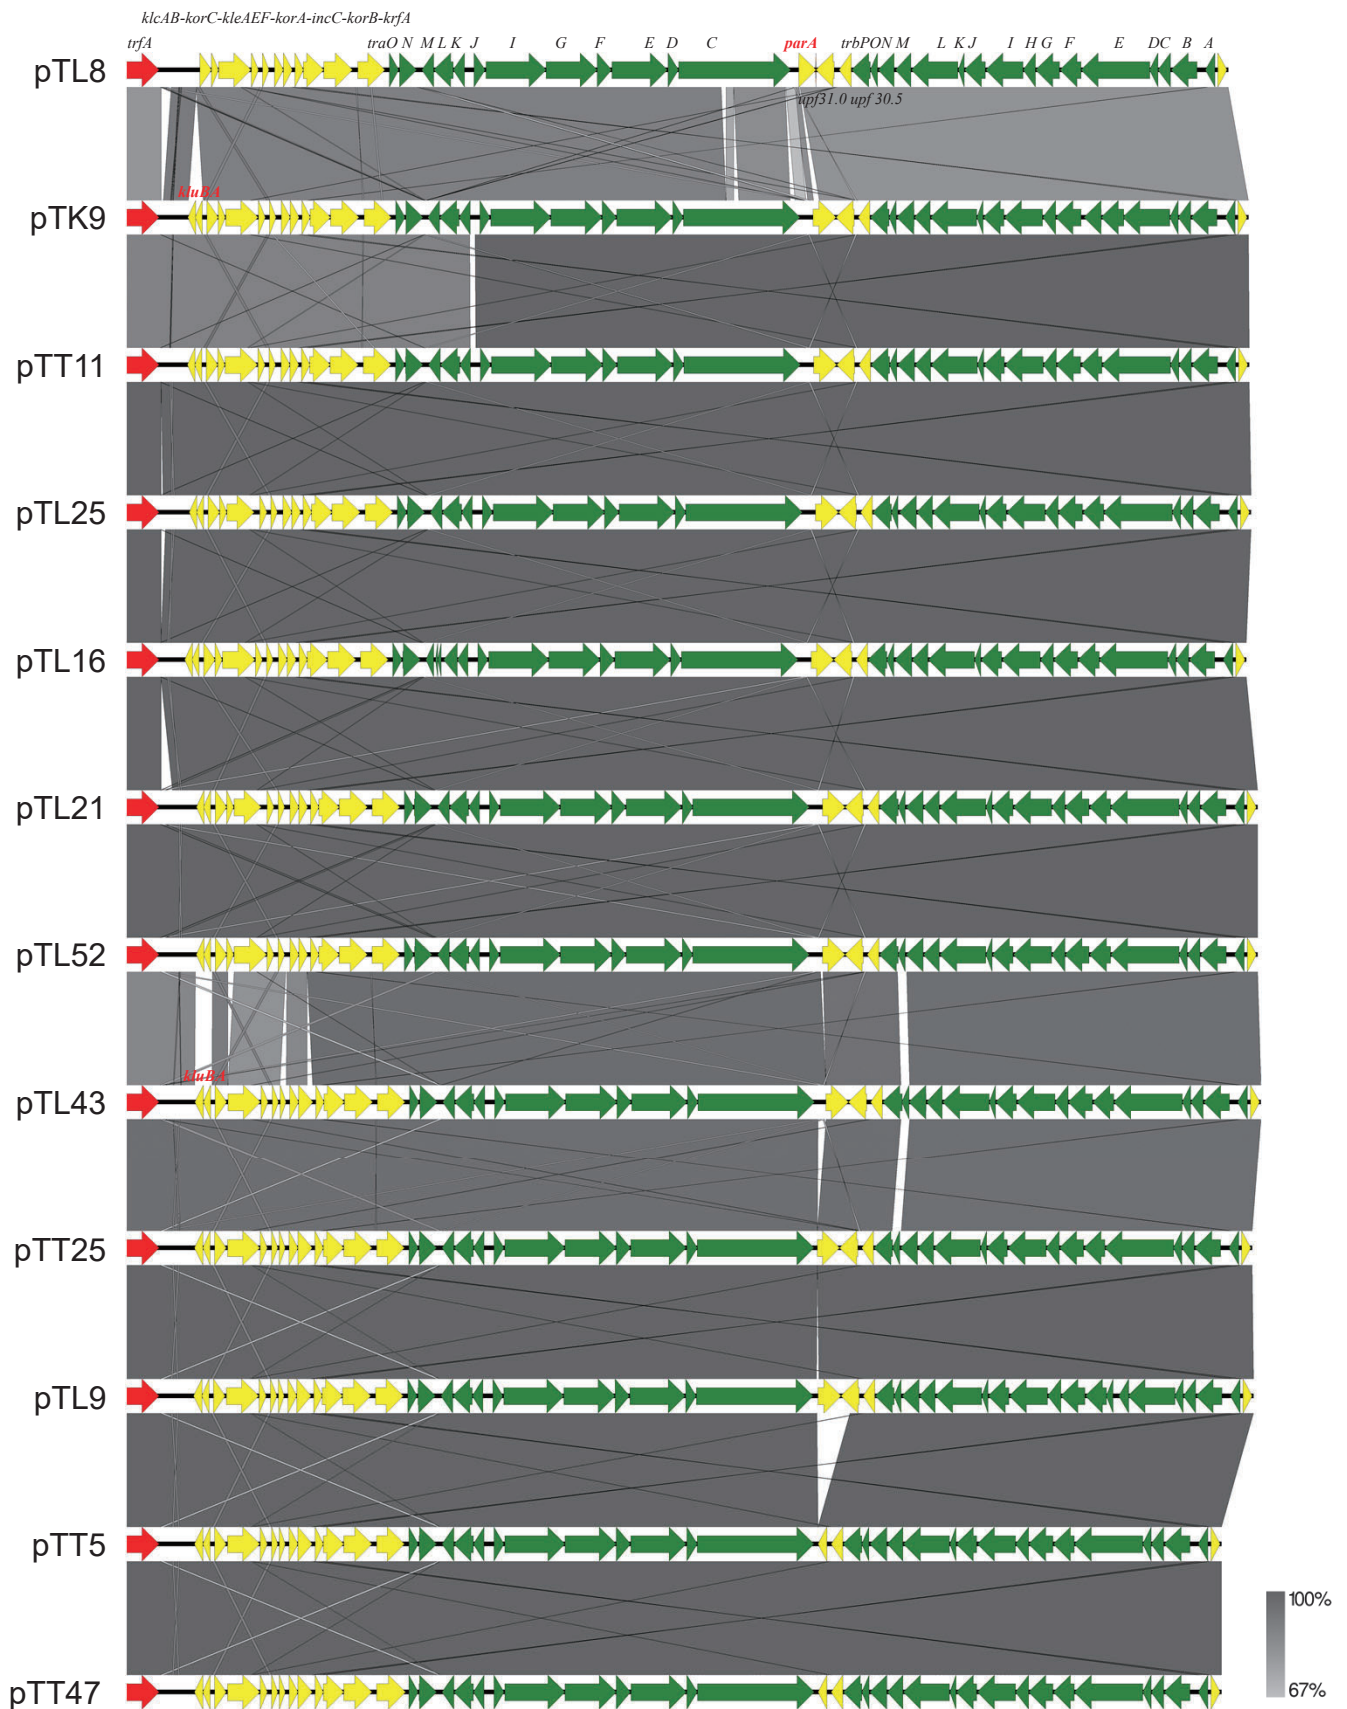

**Fig. S2.** Comparisons in the genetic structure of the IncP-1 $\beta$  backbones in the captured plasmids. The drawing way is identical with the Fig. 3 in main text, *trfA* was set as the right end of the linear plasmid maps. Block arrows indicate CDSs and the homologous regions are indicated by frame areas.

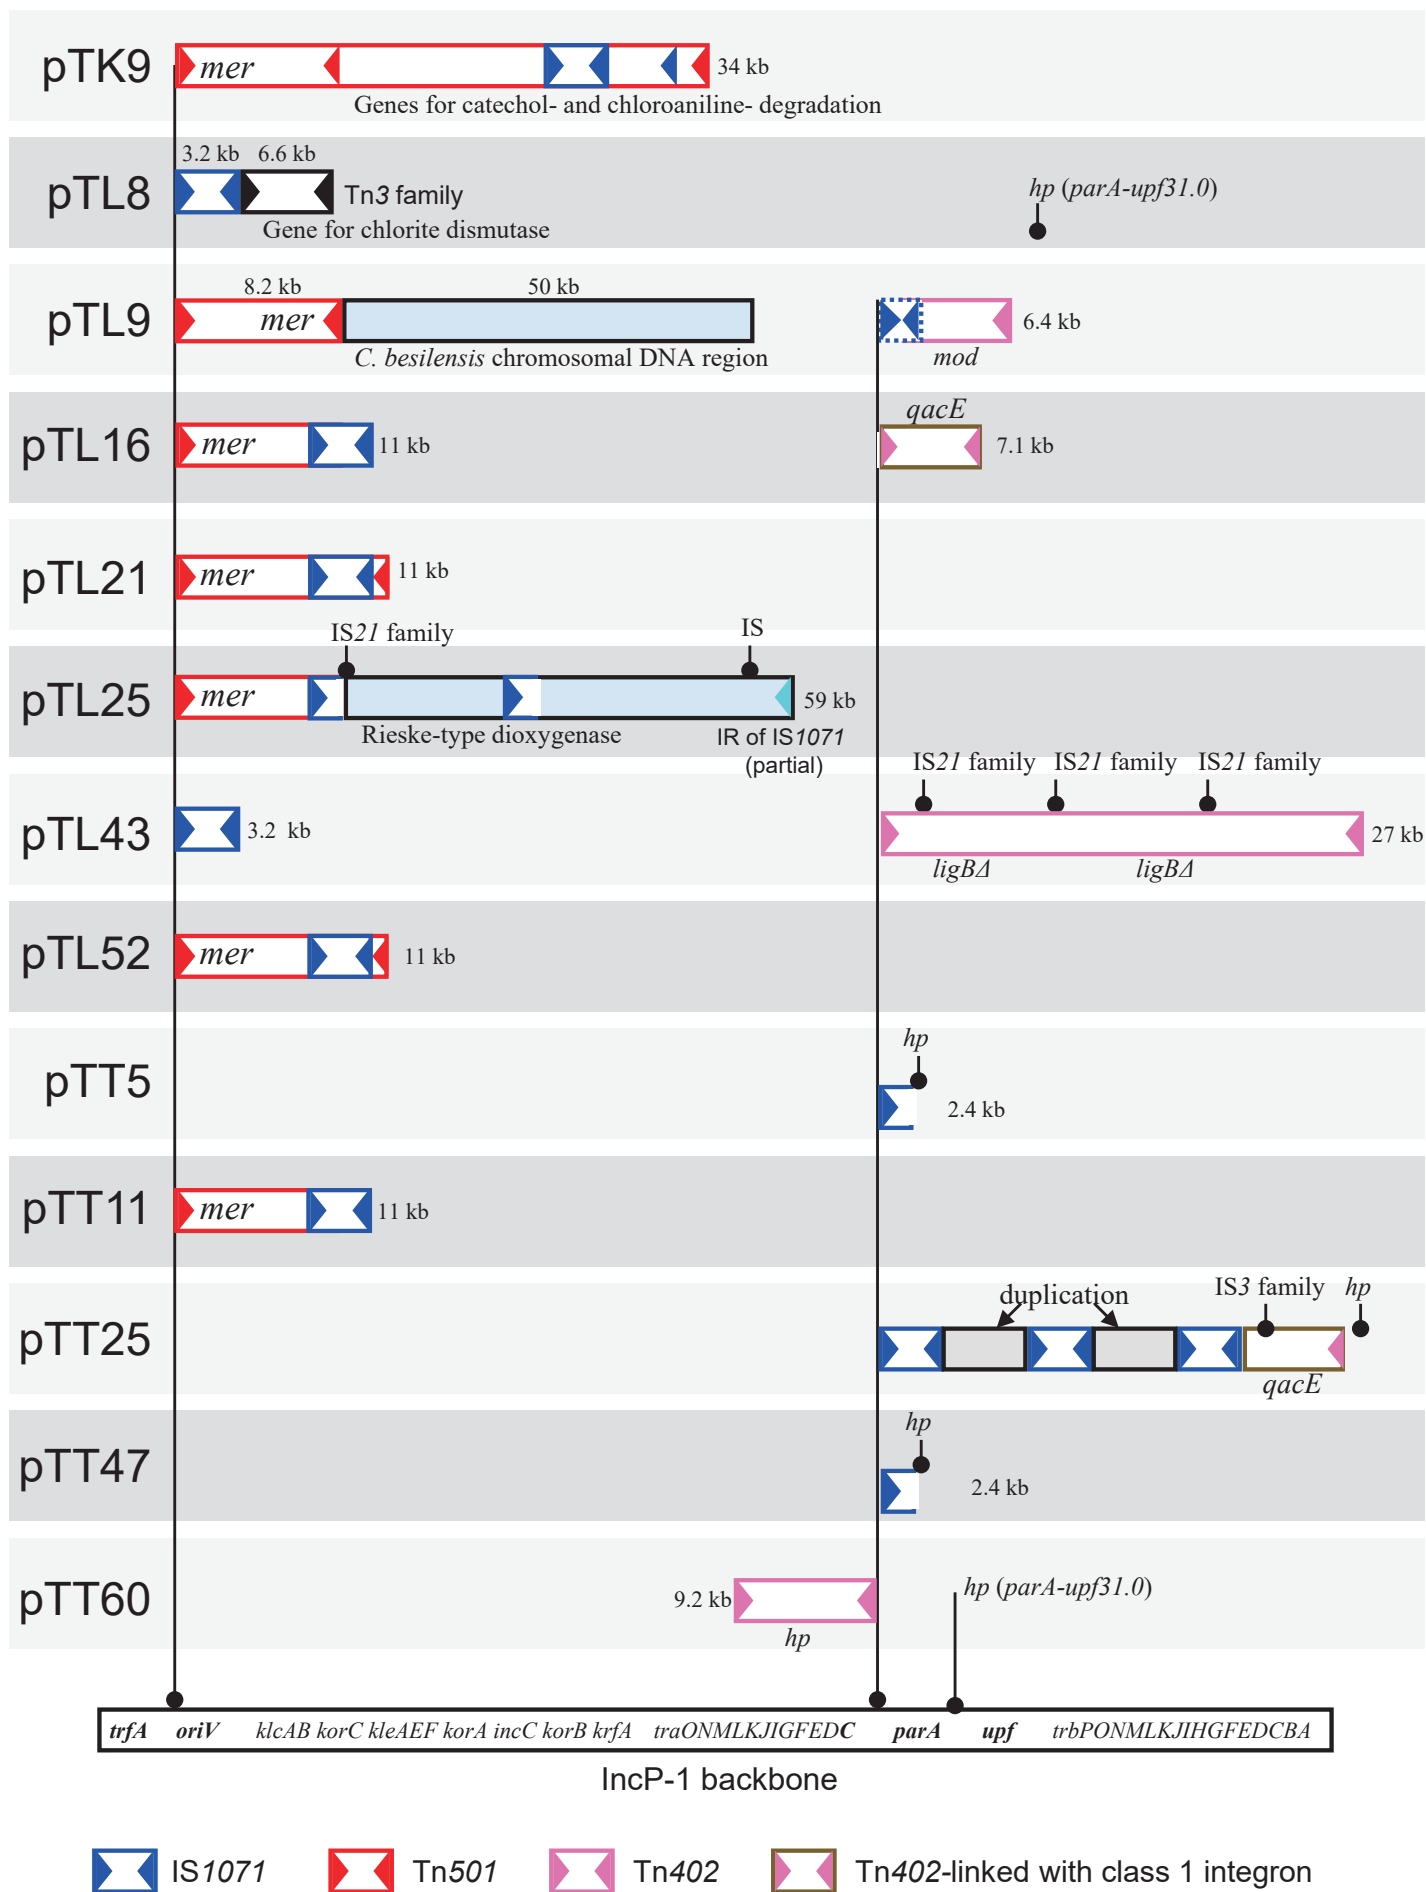

**Fig. S3.** Insertion sites of accessory genes including MGEs in the captured plasmids. Rectangles represent the inserted regions, MGEs are shown with their inverted repeats (triangles), in blue (IS1071), red (Tn501), pink (Tn402), and brown (Tn402 with class 1 integron).

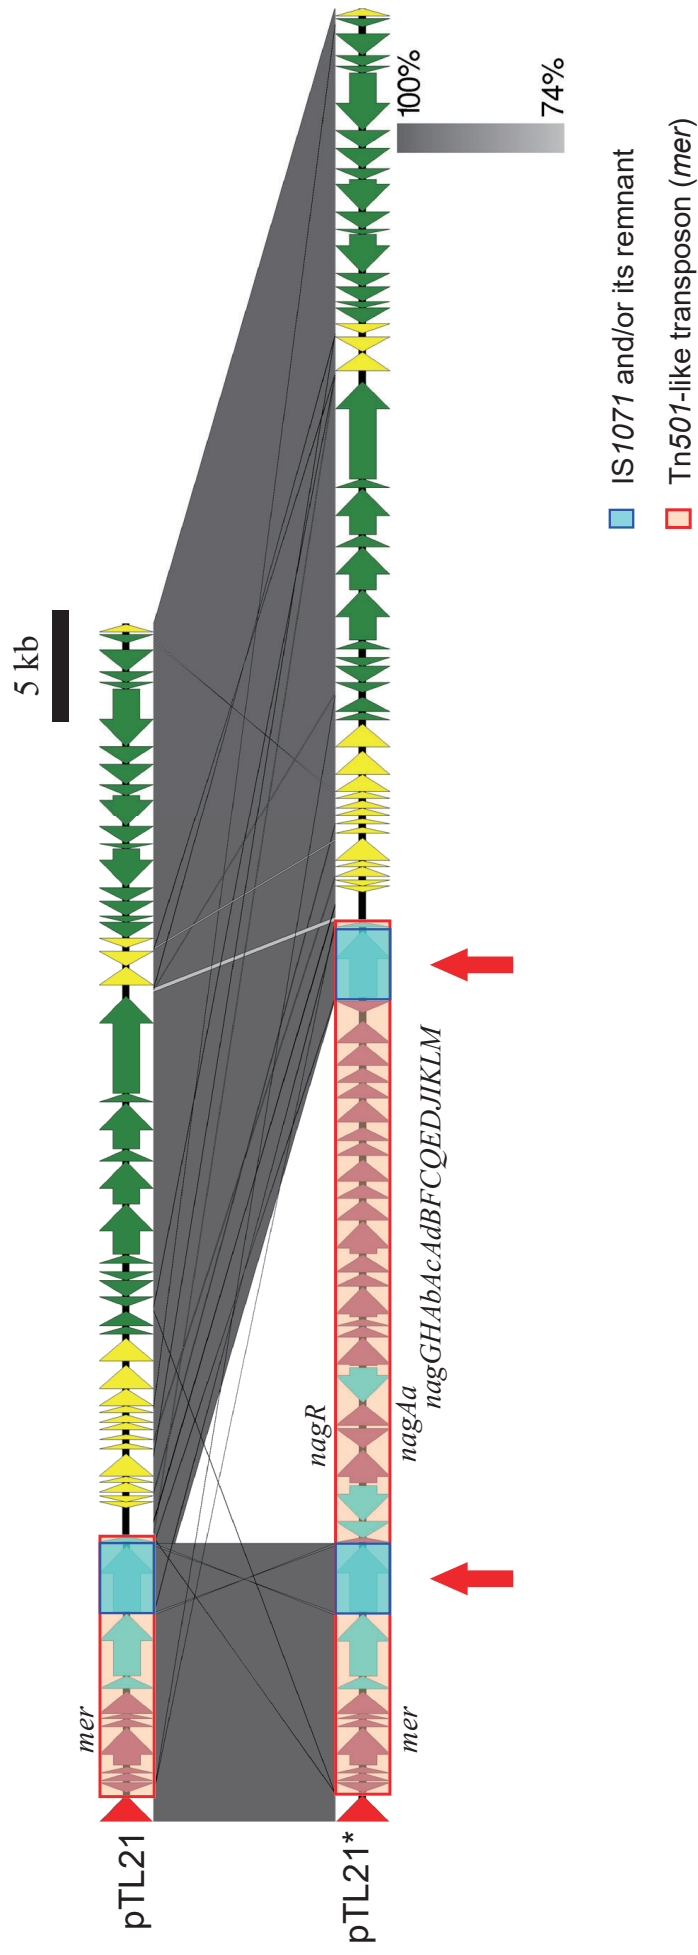

**Fig. S4.** Comparison of genetic structure between pTL21 and pTL21\*. Putative naphthalene degradative (*nag*) operon might be lost from the majority of pTL21 by homologous recombination between the identical IS1071 (red arrows). The drawing way is identical with the Fig. 3 in main text, *trfA* is set as the right end of the linear plasmid maps.



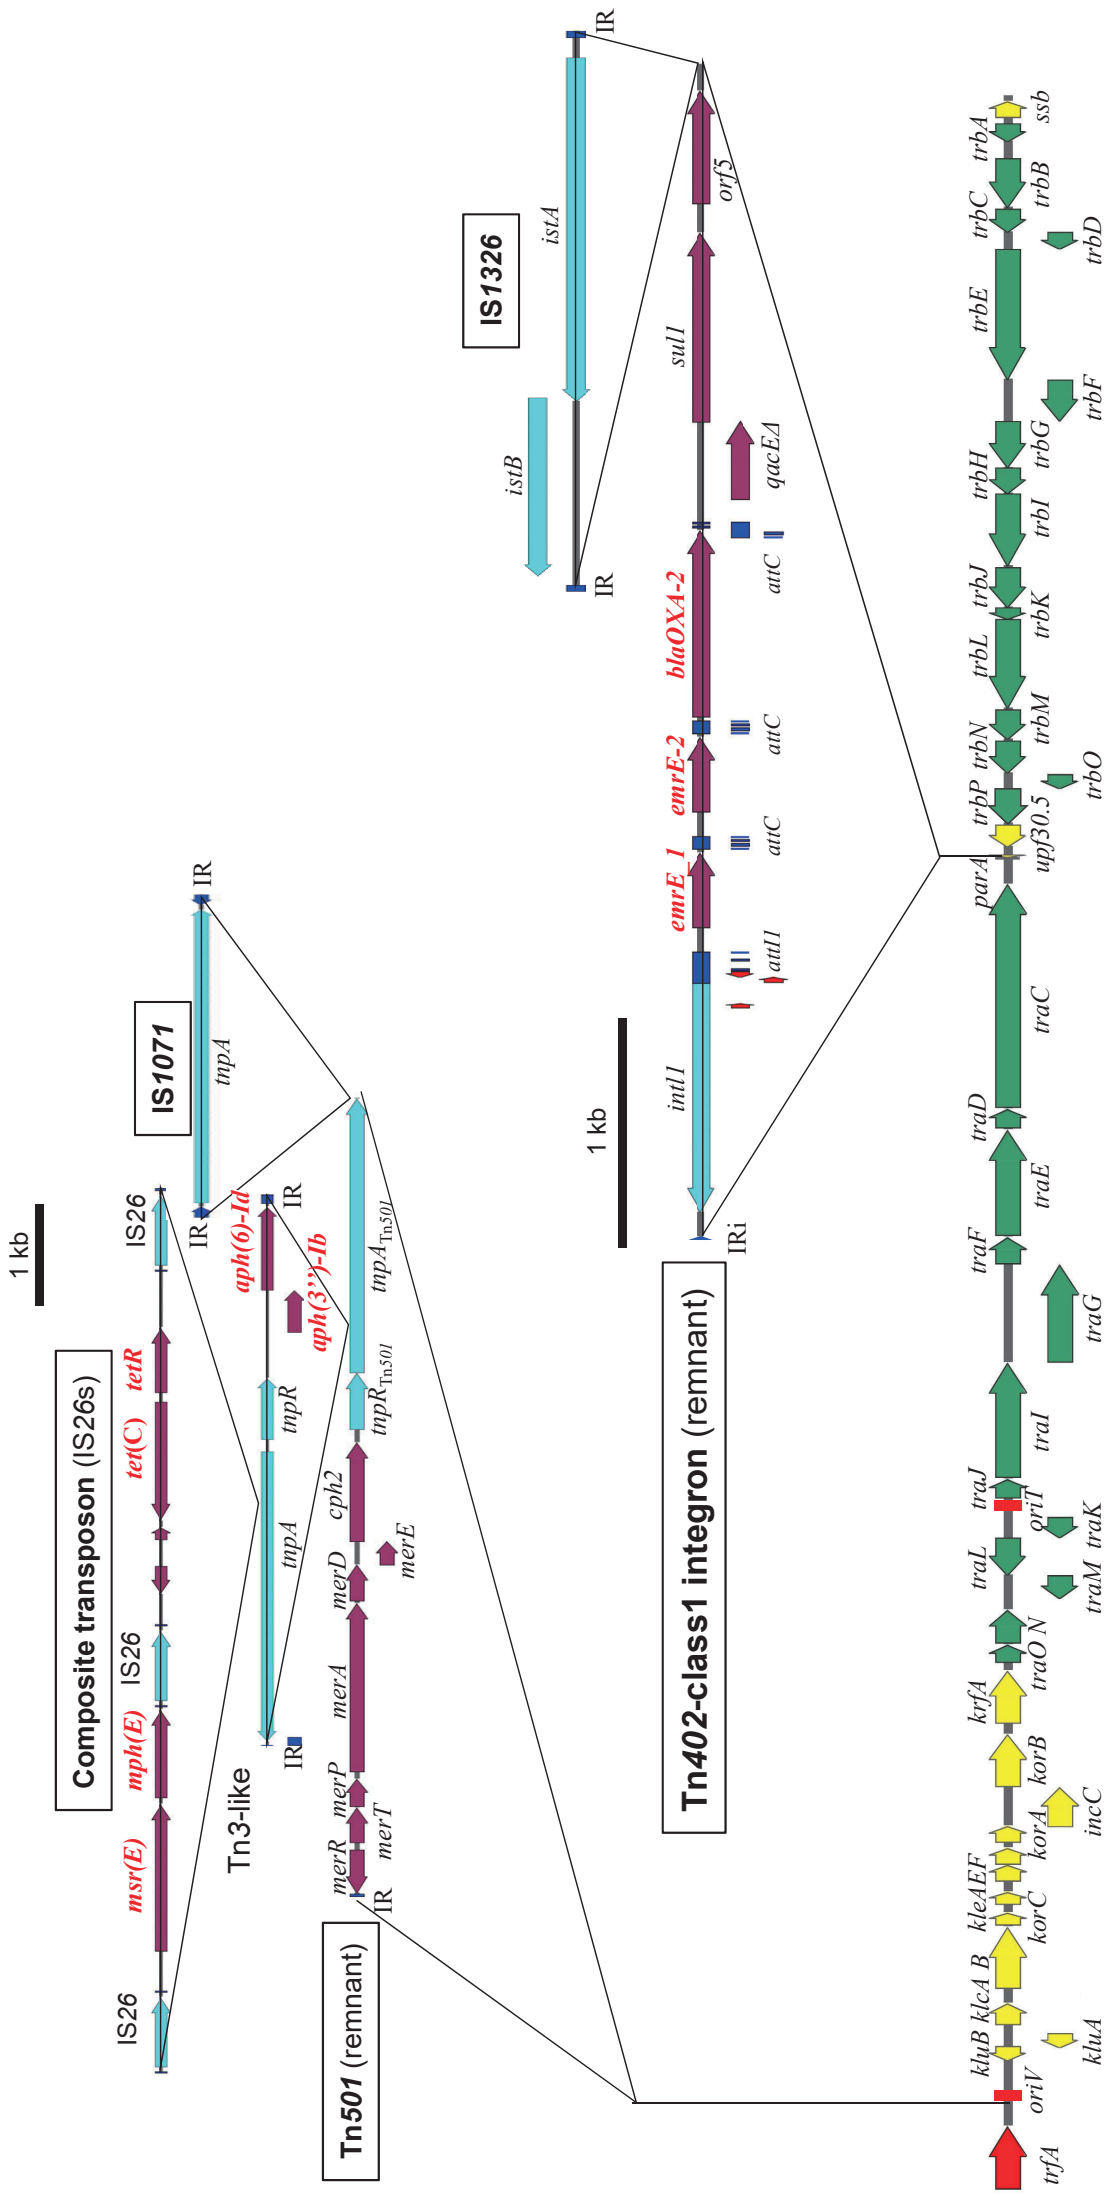

**Fig. S5.** Transposons and integron with antibiotic resistance genes inserted into pBB55. The drawing way is identical with the Fig. 3 in main text, *trfA* is set as the right end of the linear plasmid backbone. Names of antibiotic resistance genes are shown in red.



Table S1. Lists of IncP-1 plasmids obtained by exogenous plasmid capturing.

| Plasmid name | Size (bp) | Subgroup of IncP-1 group |        | Accessory genes                                                                                                        | Methods of exogenous plasmid capturing | Isolation source                                           |
|--------------|-----------|--------------------------|--------|------------------------------------------------------------------------------------------------------------------------|----------------------------------------|------------------------------------------------------------|
|              |           | Beta-1                   | Beta-2 |                                                                                                                        |                                        |                                                            |
| pAKD1        | 58246     | Beta-1                   |        | <i>mer</i> , <i>aadA</i>                                                                                               | Biparental                             | agricultural soil                                          |
| pAKD14       | 48624     | Beta-1                   |        | <i>mer</i>                                                                                                             | Biparental/triparental                 | agricultural soil                                          |
| pAKD15       | 66550     | Beta-1                   |        | <i>mer</i> , ring-hydroxylating dioxygenase                                                                            | Biparental                             | agricultural soil                                          |
| pAKD16       | 74971     | Epsilon                  |        | <i>mer</i> , alcohol dehydrogenase                                                                                     | Triparental(IncQ/P-4)                  | agricultural soil                                          |
| pAKD17       | 51755     | Beta-1                   |        | <i>mer</i>                                                                                                             | Biparental                             | agricultural soil                                          |
| pAKD18       | 67298     | Beta-1                   |        | <i>mer</i>                                                                                                             | Biparental                             | agricultural soil                                          |
| pAKD25       | 75067     | Epsilon                  |        | <i>mer</i> , <i>fdI</i> , gentisate dioxygenase, enoyl-CoA hydratase                                                   | Biparental                             | agricultural soil                                          |
| pAKD26       | 82401     | Beta-2                   |        | <i>mer</i> , <i>fdI</i> , gentisate dioxygenase, enoyl-CoA hydratase                                                   | Biparental                             | agricultural soil                                          |
| pAKD29       | 55020     | Beta-1                   |        | <i>mer</i>                                                                                                             | Biparental                             | agricultural soil                                          |
| pAKD31       | 54140     | Beta-1                   |        | <i>mer</i>                                                                                                             | Biparental                             | agricultural soil                                          |
| pAKD33       | 57974     | Beta-1                   |        | <i>mer</i> , ring-hydroxylating dioxygenase                                                                            | Biparental                             | agricultural soil                                          |
| pAKD34       | 86438     | Epsilon                  |        | <i>mer</i> , dioxygenase for aromatic compounds                                                                        | Biparental                             | agricultural soil                                          |
| pAKD4        | 56803     | Delta                    |        | <i>mer</i>                                                                                                             | Biparental/triparental                 | soil                                                       |
| pB1          | 58290     | Beta-2                   |        | <i>tetA</i>                                                                                                            | Biparental                             | municipal waste water treatment plant                      |
| pB11         | 66911     | Alpha                    |        | <i>mer</i>                                                                                                             | Biparental                             | activated sludge                                           |
| pB12         | 64393     | Beta-2                   |        | <i>tetAR</i> , <i>qacE</i> delta1, <i>mph</i>                                                                          | Biparental                             | municipal waste water treatment plant                      |
| pB3          | 56167     | Beta-1                   |        | <i>aadA2</i> , <i>tet</i>                                                                                              | Biparental                             | activated sludge                                           |
| pB4          | 79370     | Beta-2                   |        | <i>str</i> , <i>mexCDoprJ</i>                                                                                          | Biparental                             | activated sludge                                           |
| pB5          | 64696     | Alpha                    |        | <i>aacC1</i> , <i>aacA4</i>                                                                                            | Biparental                             | activated sludge                                           |
| pB8          | 57198     | Beta-1                   |        | <i>aadA4</i>                                                                                                           | Biparental                             | activated sludge                                           |
| pBB55        | 73798     | Beta-1                   |        | <i>mer</i> , <i>qacE</i> delta, <i>sul1</i> , <i>orf5</i> , <i>neo</i> , <i>tetAR</i> , <i>mph</i> (E), <i>msr</i> (E) | Biparental                             | activated sludge bacteria of a waste-water treatment plant |
| pDS1         | 40596     | Eta                      |        | <b>no accessory gene</b>                                                                                               | Triparental(pBBR1MCS)                  | manure-treated soil                                        |
| pDS3         | 40806     | Beta-1                   |        | <b>no accessory gene</b>                                                                                               | Triparental(pBBR1MCS)                  | creek water                                                |
| pDTC28       | 61503     | Beta-1                   |        | <i>mer</i> , <i>bla</i> <sub>GES-5</sub> , <i>qacE</i> delta1, <i>sul1</i> , <i>strAB</i> , <i>tetA</i>                | Biparental                             | River Sediment                                             |
| pEG1-1       | 73230     | Beta-1                   |        | <i>qacE</i> , <i>sul1</i> , <i>orf5</i> , <i>ANT</i> (3 <sup>rd</sup> ), <i>tetAR</i>                                  | Biparental                             | stream sediment                                            |
| pEMT3        | 63472     | Epsilon                  |        | chlorocatechol 1,2-dioxygenase                                                                                         | Biparental                             | agricultural soil                                          |
| pG527        | 80762     | Alpha                    |        | beta-lactamase, streptomycin, aminoglycoside, bleomycin                                                                | Biparental                             | pig manure                                                 |
| pHH128       | 56366     | Epsilon                  |        | <i>aadA1b</i> , <i>catB2</i>                                                                                           | Biparental                             | arable soil after application of pig manure                |
| pHH3408      | 51230     | Epsilon                  |        | <i>qacE</i> delta, <i>sul1</i> , <i>orf5</i>                                                                           | Biparental                             | arable soil 57 days after application of pig manure        |
| pHH3414      | 55424     | Epsilon                  |        | <i>aadA1</i> , <i>sul1</i> , <i>tetAR</i>                                                                              | Biparental                             | arable soil 85 days after application of pig manure        |
| pKJK5        | 54383     | Epsilon                  |        | <i>aadA11b</i>                                                                                                         | Triparental (pJRD25, IncQ/P-4)         | exogenous isolation from soil                              |
| pKS208       | 50604     | Gamma                    |        | <i>aphA1-IAB</i>                                                                                                       | Biparental                             | waste water treatment plant                                |
| pKS77        | 53419     | Epsilon                  |        | <i>aadB</i> , <i>qacE</i> delta1, <i>sul1</i> , <i>tetA</i>                                                            | Biparental                             | arable soil after application of pig manure                |
| pKSP212      | 54342     | Beta-1                   |        | <i>mer</i> , <i>sul1</i> , <i>aac</i>                                                                                  | Biparental                             | hospital waste water treatment plant                       |
| pMBUI1       | 44304     | Gamma                    |        | <b>no accessory gene</b>                                                                                               | Triparental(pBBR1MCS)                  | University of Idaho arboretum and botanical garden pond    |
| pMBUI8       | 53313     | Beta-1                   |        | dihydroliipoamide dehydrogenase                                                                                        | Triparental(pBBR1MCS-5)                | creek water                                                |

|            |               |                                                                                                                           |                           |                                                        |
|------------|---------------|---------------------------------------------------------------------------------------------------------------------------|---------------------------|--------------------------------------------------------|
| pMCBF6     | 66615 Zai     | <i>mer</i> , <i>mexEFoprN</i>                                                                                             | Biparental                | marine biofilm                                         |
| pMLUA1     | 58845 Epsilon | <i>tetA</i> , <i>qacE</i> delta, <i>sul1</i> , <i>orf5</i> , <i>aadA5</i> , <i>qacF5</i> , <i>mph</i> (E), <i>msrE</i>    | Biparental                | exogenous isolation from estuarine waters              |
| pMLUA3     | 57859 Epsilon | <i>tetA</i> , <i>qacE</i> delta, <i>sul1</i> , <i>orf5</i> , <i>aadA4</i> , <i>qacF5</i> , <i>mph</i> (E), <i>msr</i> (E) | Biparental                | exogenous isolation from estuarine waters              |
| pMLUA4     | 55475 Epsilon | <i>tetA</i> , <i>qacE</i> delta, <i>sul1</i> , <i>orf5</i> , <i>qacF5</i> , <i>mph</i> (E), <i>msr</i> (E)                | Biparental                | exogenous isolation from estuarine waters              |
| pQKH54     | 69966 Gamma   | <i>mer</i>                                                                                                                | Triparental (pD10)        | river epilithon                                        |
| pRSB223    | 62099 Beta-2  | <i>oxaA</i> , <i>aadA</i> , <i>qacE</i>                                                                                   | Biparental                | municipal waste water treatment plant                  |
| pRWC72a    | 61919 Beta-1  | <i>tetA</i> , <i>qacE</i> delta, <i>sul1</i> , <i>mph</i> (B), <i>mrX</i> (B),<br><b>no accessory gene</b>                | Direct capturing          | wastewater treatment plant influent                    |
| pSN1104-59 | 50476 Beta-1  | <i>aadA1</i> , <i>aacA4</i> , <i>oxa-2</i>                                                                                | Triparental (pBBR1 MCS-2) | anaerobic granule                                      |
| pSP21      | 72683 Alpha   | <i>aadA1</i> , <i>aadA4</i> , <i>tetA</i>                                                                                 | Biparental                | activated sludge                                       |
| pTB11      | 68869 Alpha   | <i>mer</i>                                                                                                                | Biparental                | activated sludge basin of a waste-watertreatment plant |
| pTK9       | 76102 Beta-1  | <i>mer</i> , <i>qacE</i>                                                                                                  | Triparental (IncQ/P-4)    | rhizosphere of potato                                  |
| pTL16      | 59989 Beta-1  | <i>mer</i>                                                                                                                | Triparental (IncQ/P-4)    | rhizosphere of lettuce                                 |
| pTL21      | 53599 Beta-1  | <i>mer</i> , <i>siaI</i>                                                                                                  | Triparental (IncQ/P-4)    | rhizosphere of lettuce                                 |
| pTL25      | 102276 Beta-1 | putative D-malate degradative genes                                                                                       | Triparental (IncQ/P-4)    | rhizosphere of lettuce                                 |
| pTL43      | 72288 Beta-1  | <b>no accessory gene</b>                                                                                                  | Triparental (IncQ/P-4)    | rhizosphere of lettuce                                 |
| pTL50      | 39671 Epsilon | <i>mer</i>                                                                                                                | Triparental (IncQ/P-4)    | rhizosphere of lettuce                                 |
| pTL52      | 53601 Beta-1  | <b>no accessory gene</b>                                                                                                  | Triparental (IncQ/P-4)    | rhizosphere of lettuce                                 |
| pTL8       | 51488 Beta-2  | <b>no accessory gene</b>                                                                                                  | Triparental (IncQ/P-4)    | rhizosphere of lettuce                                 |
| pTL9       | 107234 Beta-1 | <i>mer</i> , chromosomal DNA                                                                                              | Triparental (IncQ/P-4)    | rhizosphere of lettuce                                 |
| pTP6       | 54344 Beta-1  | <i>mer</i>                                                                                                                | Triparental (IncQ/P-4)    | Mercury-polluted river sediment                        |
| pTT11      | 53011 Beta-1  | <i>mer</i>                                                                                                                | Triparental (IncQ/P-4)    | rhizosphere of tomato                                  |
| pTT25      | 83086 Beta-1  | <i>qacE</i>                                                                                                               | Triparental (IncQ/P-4)    | rhizosphere of tomato                                  |
| pTT47      | 43582 Beta-1  | <b>no accessory gene</b>                                                                                                  | Triparental (IncQ/P-4)    | rhizosphere of tomato                                  |
| pTT5       | 43580 Beta-1  | <b>no accessory gene</b>                                                                                                  | Triparental (IncQ/P-4)    | rhizosphere of tomato                                  |
| pTT60      | 50519 Delta   | <i>rhaS</i> (L-rhamnose operon regulatory protein)                                                                        | Triparental (IncQ/P-4)    | rhizosphere of tomato                                  |
| pWEC911    | 74056 Alpha   | <i>mer</i> , tetracycline resistance gene                                                                                 | Biparental                | sugar beet rhizosphere                                 |

Table S2. IncP-1 plasmids captured from rhizosphere.

| Source              | Name  | No. of plasmid restriction patterns | GenBank accession no. | Size (bp) | IncP-1 subgroup | Insert size including MGEs (bp)                           | Presence of Tn, integron, and IS elements                                                       |                                                  |                           |                                                | Notes for insertions of accessory genes                                                                                             |                                                                                                                                                                                                                                                   |
|---------------------|-------|-------------------------------------|-----------------------|-----------|-----------------|-----------------------------------------------------------|-------------------------------------------------------------------------------------------------|--------------------------------------------------|---------------------------|------------------------------------------------|-------------------------------------------------------------------------------------------------------------------------------------|---------------------------------------------------------------------------------------------------------------------------------------------------------------------------------------------------------------------------------------------------|
|                     |       |                                     |                       |           |                 |                                                           | Tn501 (with <i>mer</i> -like)                                                                   | Tn402-like                                       | integron ( <i>intI</i> )  | IS1071                                         |                                                                                                                                     | others                                                                                                                                                                                                                                            |
| potato rhizosphere  | pTK9  | 1                                   | MH392233              | 76,102    | $\beta$ 1       | 34,364                                                    | <i>trfA-orfV</i> (intact)                                                                       | -                                                | -                         | <i>trfA-orfV</i> (intact)                      | other <i>mpA</i> ( <i>trfA-orfV</i> )                                                                                               | putative gene sets for catechol and chloroamine degradation (14,372 bp, <i>trfA-orfV</i> )                                                                                                                                                        |
|                     | pTL8  | 1                                   | MH392240              | 51,448    | $\beta$ 2       | 9,971                                                     | -                                                                                               | -                                                | -                         | <i>trfA-orfV</i> (intact, with direct repeats) | Tn3-family transposase ( <i>trfA-orfV</i> )                                                                                         | chlorite dismutase gene in Tn3-family transposon (6,625 bp, <i>trfA-orfV</i> )                                                                                                                                                                    |
|                     | pTL9  | 1                                   | MH392241              | 107,234   | $\beta$ 1       | 58,648 ( <i>trfA-orfV</i> )<br>6,441 ( <i>traC-parA</i> ) | <i>trfA-orfV</i> (intact)                                                                       | <i>traC-parA</i> (remnant)                       | -                         | <i>trfA-orfV</i> (remnant)                     | -                                                                                                                                   | hypothetical protein gene ( <i>parA-tpg31.0</i> )                                                                                                                                                                                                 |
| lettuce rhizosphere | pTL16 | 1                                   | MH392234              | 59,989    | $\beta$ 1       | 11,167 ( <i>trfA-orfV</i> )<br>7,085 ( <i>traC-parA</i> ) | [IS1071 was inserted into <i>mpA</i> <sub>Tn501</sub> (yielding <i>mpA</i> <sub>Tn501</sub> Δ)] | <i>traC-parA</i> (intact, with class 1 integron) | <i>trfA-orfV</i> (intact) | -                                              | -                                                                                                                                   | chromosomal DNA region of <i>Citriavidus besenianii</i> with putative metabolic genes related to glycolate and/or pyruvate (50,420 bp, <i>trfA-orfV</i> )<br>molybdate or molybdenum transporter ( <i>modEAGC</i> ) (4,321 bp, <i>traC-parA</i> ) |
|                     | pTL21 | 1                                   | MH392235              | 53,599    | $\beta$ 1       | 11,439                                                    | [IS1071 was inserted into <i>mpA</i> <sub>Tn501</sub> (yielding <i>mpA</i> <sub>Tn501</sub> Δ)] | -                                                | -                         | <i>trfA-orfV</i> (intact)                      | -                                                                                                                                   | -                                                                                                                                                                                                                                                 |
|                     | pTL25 | 1                                   | MH392236              | 102,276   | $\beta$ 1       | 59,037                                                    | [IS1071 was inserted into <i>mpA</i> <sub>Tn501</sub> (yielding <i>mpA</i> <sub>Tn501</sub> Δ)] | -                                                | -                         | <i>trfA-orfV</i> (two IS1071 remnants)         | IS-like element, several transposase ( <i>trfA-orfV</i> ) IS-like element (IS116/IS110/IS902 type transposase) ( <i>tkc-B-koC</i> ) | Gene sets for putative novel dioxygenase (Rieske-type terminal oxygenase, ferredoxin, ferredoxin reductase for aromatic compound), C4-organic acid transporter, CoA-dependent metabolism ( <i>trfA-orfV</i> )                                     |

|       |    |          |        |            |                                                           |   |                                                                                                                                                                                                                   |                                                    |                                                                                                                               |                                                       |                                                                                                                                      |
|-------|----|----------|--------|------------|-----------------------------------------------------------|---|-------------------------------------------------------------------------------------------------------------------------------------------------------------------------------------------------------------------|----------------------------------------------------|-------------------------------------------------------------------------------------------------------------------------------|-------------------------------------------------------|--------------------------------------------------------------------------------------------------------------------------------------|
| pTL43 | 1  | MH392237 | 72,288 | $\beta$ I  | 3,204 ( <i>trfA-oriV</i> )<br>26,797 ( <i>traC-parA</i> ) | - | <i>traC-parA</i><br>(intact, with metabolic genes and three ISs)                                                                                                                                                  | -                                                  | <i>trfA-oriV</i><br>(intact, with direct repeats)                                                                             | Three copies of IS2 / family ISs ( <i>traC-parA</i> ) | metabolic genes (extradiol dioxygenase)<br>( <i>traC-parA</i> )                                                                      |
| pTL50 | 4  | MH392238 | 39,671 | $\epsilon$ | -                                                         | - | -                                                                                                                                                                                                                 | -                                                  | -                                                                                                                             | -                                                     | -                                                                                                                                    |
| pTL52 | 1  | MH392239 | 53,601 | $\beta$ I  | 11,440                                                    | - | <i>trfA-oriV</i><br>[IS1071 was inserted into <i>mpA</i> <sub>T<sub>600</sub></sub> yielding <i>mpA</i> <sub>T<sub>600</sub>Δ</sub> ]                                                                             | -                                                  | <i>trfA-oriV</i><br>(intact, with direct repeats)                                                                             | -                                                     | -                                                                                                                                    |
| pTT5  | 3  | MH392245 | 43,580 | $\beta$ I  | 2,523                                                     | - | -                                                                                                                                                                                                                 | -                                                  | <i>trfA-oriV</i><br>(remnant, <i>parA</i> was lost)                                                                           | -                                                     | -                                                                                                                                    |
| pTT11 | 21 | MH392242 | 53,011 | $\beta$ I  | 11,168                                                    | - | <i>trfA-oriV</i><br>[IS1071 was inserted into <i>mpA</i> <sub>T<sub>600</sub></sub> yielding <i>mpA</i> <sub>T<sub>600</sub>Δ</sub> ]                                                                             | -                                                  | <i>trfA-oriV</i><br>( <i>mpA</i> <sub>IS1071</sub> was frameshifted)                                                          | -                                                     | -                                                                                                                                    |
| pTT25 | 1  | MH392243 | 83,086 | $\beta$ I  | 38,998                                                    | - | <i>traC-parA</i><br>(remnant, <i>trfA</i> <sub>T<sub>600</sub></sub> was disrupted by IS3 family element, <i>trfA</i> <sub>T<sub>600</sub></sub> and partial <i>trfA</i> <sub>T<sub>600</sub></sub> were deleted) | <i>traC-parA</i><br>(with intact <i>trfA</i> gene) | <i>traC-parA</i><br>(three copies of intact IS1071, two of them were identical, the other showed one nucleotide substitution) | -                                                     | acetyl-coenzyme A synthetase, putative genes for transporter, transcriptional regulator, duplicated DNA regions surrounded by IS1071 |
| pTT47 | 12 | MH392244 | 43,582 | $\beta$ I  | 2,524                                                     | - | -                                                                                                                                                                                                                 | -                                                  | <i>trfA-oriV</i><br>(remnant, <i>parA</i> was lost)                                                                           | -                                                     | -                                                                                                                                    |
| pTT60 | 2  | MH392246 | 50,519 | $\delta$   | 9,178                                                     | - | <i>traC-parA</i><br>(intact, with DRs)                                                                                                                                                                            | -                                                  | -                                                                                                                             | -                                                     | Tn402-like transposon with genes for putative ester cyclase, and glucose-C-phosphate isomerase                                       |

|                                  |       |   |          |        |    |                                                           |                                                                                                                                                                                                                                                                                                                                                                                                                                                                                                                                                             |                                                                                                        |                                                                                                                                                                                                                                                                                  |
|----------------------------------|-------|---|----------|--------|----|-----------------------------------------------------------|-------------------------------------------------------------------------------------------------------------------------------------------------------------------------------------------------------------------------------------------------------------------------------------------------------------------------------------------------------------------------------------------------------------------------------------------------------------------------------------------------------------------------------------------------------------|--------------------------------------------------------------------------------------------------------|----------------------------------------------------------------------------------------------------------------------------------------------------------------------------------------------------------------------------------------------------------------------------------|
| Soil<br>(amended with<br>manure) | pBB55 | 1 | MH392232 | 73,798 | β1 | 25,470 ( <i>trfA-orfV</i> )<br>7,745 ( <i>trac-parA</i> ) | <p><i>trfA-orfV</i></p> <p>[S1071 Tn3-family<br/>transposon and composite<br/>transposon were inserted<br/>into <i>mpA</i><sub>76-91</sub><br/>(yielding <i>mpA</i><sub>1800-Δ</sub>)]</p> <p><i>parA-upf31.0</i><br/>(remnant, only one copy of<br/>the inverted repeats of Tn402<br/>was found, <i>mi4BRQ</i><sub>Tn402</sub><br/>were deleted by insertion of<br/>S1326 family elementno<br/>other genes)</p> <p><i>parA-upf31.0</i><br/>(with <i>qacHa</i>, <i>qacHb</i>, <i>bla</i>,<br/><i>qacExuI/orf5</i>)</p> <p><i>trfA-orfV</i><br/>(intact)</p> | <p>IS1326-like (<i>parA-upf31.0</i>)</p> <p>Tn3 family transposon<br/>(remnant) (<i>trfA-orfV</i>)</p> | <p>antibiotic resistance genes, <i>ter</i>,<br/>gene for APH(3') family<br/>aminoglycoside O-<br/>phosphotransferase (not named<br/>yet), <i>strB</i>, in Tn301-like<br/>transposon remnant, and <i>qacL</i>,<br/><i>qacL_2</i>, and <i>bla</i> in Tn402-class1<br/>integron</p> |
|----------------------------------|-------|---|----------|--------|----|-----------------------------------------------------------|-------------------------------------------------------------------------------------------------------------------------------------------------------------------------------------------------------------------------------------------------------------------------------------------------------------------------------------------------------------------------------------------------------------------------------------------------------------------------------------------------------------------------------------------------------------|--------------------------------------------------------------------------------------------------------|----------------------------------------------------------------------------------------------------------------------------------------------------------------------------------------------------------------------------------------------------------------------------------|

Table S3. Accession no. of IncP-1 plasmids.

| Name               | Accession number | Organism                                                              |
|--------------------|------------------|-----------------------------------------------------------------------|
| unnamed5           | NZ_CP038640.1    | <i>Cupriavidus oxalaticus</i>                                         |
| unnamed2           | NZ_CP019238.1    | <i>Rhodoferax koreense</i>                                            |
| unnamed_2          | NZ_CP015373.1    | <i>Pandoraea pnomenusa</i>                                            |
| RK2                | BN000925.1       | Birmingham IncP-alpha plasmid                                         |
| R906               | KF743818.1       | <i>Bordetella bronchiseptica</i>                                      |
| R772               | KF743817.1       | <i>Proteus mirabilis</i>                                              |
| R751               | NC_001735.4      | <i>Klebsiella aerogenes</i>                                           |
| pZJ623             | KX580713.1       | <i>Escherichia coli</i>                                               |
| pYS1               | NC_019369.1      | <i>Burkholderia cepacia</i>                                           |
| pYDC107_41         | NZ_CP025711.1    | <i>Escherichia coli</i>                                               |
| pWEC911            | JX469833.1       | uncultured bacterium                                                  |
| pWDL7              | GQ495894.1       | synthetic construct                                                   |
| pUO1               | NC_005088.1      | <i>Delftia acidovorans</i>                                            |
| pTT60              | MH392246.1       | uncultured bacterium                                                  |
| pTT5               | MH392245.1       | uncultured bacterium                                                  |
| pTT47              | MH392244.1       | uncultured bacterium                                                  |
| pTT25              | MH392243.1       | uncultured bacterium                                                  |
| pTT11              | MH392242.1       | uncultured bacterium                                                  |
| pTP6               | AM048832.1       | uncultured bacterium                                                  |
| pTL9               | MH392241.1       | uncultured bacterium                                                  |
| pTL8               | MH392240.1       | uncultured bacterium                                                  |
| pTL52              | MH392239.1       | uncultured bacterium                                                  |
| pTL50              | MH392238.1       | uncultured bacterium                                                  |
| pTL43              | MH392237.1       | uncultured bacterium                                                  |
| pTL25              | MH392236.1       | uncultured bacterium                                                  |
| pTL21              | MH392235.1       | uncultured bacterium                                                  |
| pTL16              | MH392234.1       | uncultured bacterium                                                  |
| pTK9               | MH392233.1       | uncultured bacterium                                                  |
| pTB30              | NC_016968.1      | <i>Comamonas testosteroni</i>                                         |
| pTB11              | AJ744860.1       | uncultured bacterium                                                  |
| pSP21              | CP002153.1       | uncultured bacterium                                                  |
| pSN1104-59         | AP018709.1       | uncultured bacterium                                                  |
| pSEHO0A1           | AGRM01000006.1   | <i>Salmonella enterica</i> subsp. <i>houtenae</i>                     |
| pRWC72a            | JX486125.1       | uncultured bacterium                                                  |
| pRSB223            | JX469828.1       | uncultured bacterium                                                  |
| pQKH54             | AM157767.1       | uncultured bacterium                                                  |
| pP09019            | NZ_CP017455.1    | <i>Dickeya solani</i>                                                 |
| pNCYU-29-69-3_MCR3 | CP042602.1       | <i>Escherichia coli</i>                                               |
| pNB8c              | NC_019264.1      | <i>Delftia acidovorans</i>                                            |
| pMLUA4             | KC964607.1       | uncultured bacterium                                                  |
| pMLUA3             | KC964606.1       | uncultured bacterium                                                  |
| pMLUA1             | KC964605.1       | uncultured bacterium                                                  |
| pMCR3_WCHEC-LL123  | MF489760.1       | <i>Escherichia coli</i>                                               |
| pMCR3_WCHEC1943    | MF678351.1       | <i>Escherichia coli</i>                                               |
| pMCR3_025943       | NZ_CP027203.2    | <i>Escherichia coli</i>                                               |
| pMCR16_P053        | KY352406.1       | <i>Salmonella enterica</i> subsp. <i>enterica</i> serovar Typhimurium |
| pMCR_WCHEC1622     | KY463452.1       | <i>Escherichia coli</i>                                               |
| pMCR_BE2-5         | NZ_CP032987.1    | <i>Escherichia coli</i>                                               |
| pMCR_1511          | KX377410.1       | <i>Klebsiella pneumoniae</i>                                          |
| pMCBF6             | NC_025028.1      | uncultured bacterium                                                  |
| pMBUI8             | KC170279.1       | uncultured bacterium                                                  |
| pMBUI1             | JQ432563.1       | uncultured bacterium                                                  |
| pLME1              | NC_019263.1      | <i>Delftia acidovorans</i>                                            |
| pLM159.2           | NZ_CP018471.1    | <i>Xanthomonas vesicatoria</i>                                        |
| pKV29              | NC_019312.1      | <i>Delftia</i> sp. KV29                                               |
| pKSP212            | JX469831.1       | uncultured bacterium                                                  |

|                 |               |                                                               |
|-----------------|---------------|---------------------------------------------------------------|
| pKS77           | JQ004409.1    | uncultured bacterium                                          |
| pKS208          | JQ432564.1    | uncultured bacterium                                          |
| pKPCAPSS        | KP008371.1    | <i>Klebsiella pneumoniae</i>                                  |
| pKJK5           | AM261282.1    | uncultured bacterium                                          |
| pKJK172         | NZ_CP028340.1 | <i>Thauera aromatica</i> K172                                 |
| pJP4            | NC_007337.1   | <i>Cupriavidus pinatubonensis</i> JMP134                      |
| pIJB1           | NC_019378.1   | <i>Burkholderia cepacia</i>                                   |
| pICP-4GES       | MH053445.1    | <i>Pseudomonas aeruginosa</i>                                 |
| pI2             | NC_016978.1   | <i>Comamonas testosteroni</i>                                 |
| pHS102707       | NC_023907.1   | <i>Escherichia coli</i>                                       |
| pHNGDF36-1      | MF978389.1    | <i>Escherichia coli</i>                                       |
| pHNGDF1-1       | MF990207.1    | <i>Escherichia coli</i>                                       |
| pHNFP671        | KP324830.1    | <i>Escherichia coli</i>                                       |
| pHKSHmcr1_P2_p1 | MF136778.1    | <i>Escherichia coli</i>                                       |
| pHH3414         | JQ004408.1    | uncultured bacterium                                          |
| pHH3408         | JQ004407.1    | uncultured bacterium                                          |
| pHH128          | JQ004406.1    | uncultured bacterium                                          |
| pHB44           | KU356988.1    | <i>Variovorax paradoxus</i>                                   |
| pG527           | JX469830.1    | uncultured bacterium                                          |
| pEST4011        | NC_005793.2   | <i>Achromobacter denitrificans</i>                            |
| pENH91          | NZ_CP017760.1 | <i>Cupriavidus necator</i>                                    |
| pEN3600         | NZ_CP035638.1 | <i>Enterobacter cloacae</i>                                   |
| pEMT3           | JX469827.1    | uncultured bacterium                                          |
| pEGD-AKN5       | KP289281.1    | <i>Pseudomonas</i> sp. EGD-AKN5                               |
| pEG1-1          | MG879028.1    | uncultured bacterium                                          |
| pECSC102        | MG552133.1    | <i>Escherichia coli</i>                                       |
| pDTC28          | KU238092.1    | uncultured bacterium                                          |
| pDS3            | JX469834.1    | uncultured bacterium                                          |
| pDS1            | KC170283.1    | uncultured bacterium                                          |
| pDB1            | NC_019320.1   | <i>Variovorax</i> sp. DB1                                     |
| pCNB            | NC_010935.1   | <i>Comamonas testosteroni</i> CNB-1                           |
| pCFSA664-2      | NZ_CP033354.2 | <i>Salmonella enterica</i> subsp. <i>enterica</i>             |
| pC1-1           | NC_019283.1   | <i>Delftia acidovorans</i>                                    |
| pBS64           | KU356987.1    | <i>Variovorax paradoxus</i>                                   |
| pBS228          | NC_008357.1   | <i>Pseudomonas aeruginosa</i>                                 |
| pBRA100         | NC_017908.2   | <i>Mycobacteroides abscessus</i> subsp. <i>bolletii</i> F1725 |
| pBP136          | NC_008459.1   | <i>Bordetella pertussis</i>                                   |
| pBII_1          | NZ_CP009797.1 | <i>Burkholderia ambifaria</i> AMMD                            |
| pBHB            | NC_021077.1   | <i>Comamonas</i> sp. 7D-2                                     |
| pBB55           | MH392232.1    | uncultured bacterium                                          |
| pBAM1           | NZ_CP028967.1 | <i>Aminobacter</i> sp. MSH1                                   |
| pB8             | AJ863570.1    | uncultured bacterium                                          |
| pB5             | CP002151.1    | uncultured bacterium                                          |
| pB4             | AJ431260.1    | uncultured bacterium                                          |
| pB3             | AJ639924.1    | uncultured bacterium                                          |
| pB12            | JX469826.1    | uncultured bacterium                                          |
| pB11            | CP002152.1    | uncultured bacterium                                          |
| pB1             | JX469829.1    | uncultured bacterium                                          |
| pAOVO02         | NC_008766.1   | <i>Acidovorax</i> sp. JS42                                    |
| pAMMD1          | NC_008385.1   | <i>Burkholderia ambifaria</i> AMMD                            |
| pALIDE02        | NC_014911.1   | <i>Alicyclophilus denitrificans</i> BC                        |
| pAKD4           | GQ983559.1    | uncultured bacterium                                          |
| pAKD34          | JN106175.1    | uncultured bacterium                                          |
| pAKD33          | JN106174.1    | uncultured bacterium                                          |
| pAKD31          | JN106173.1    | uncultured bacterium                                          |
| pAKD29          | JN106172.1    | uncultured bacterium                                          |
| pAKD26          | JN106171.1    | uncultured bacterium                                          |
| pAKD25          | JN106170.1    | uncultured bacterium                                          |
| pAKD18          | JN106169.1    | uncultured bacterium                                          |
| pAKD17          | JN106168.1    | uncultured bacterium                                          |
| pAKD16          | JN106167.1    | uncultured bacterium                                          |



|             |               |                                               |
|-------------|---------------|-----------------------------------------------|
| pAKD15      | JN106166.1    | uncultured bacterium                          |
| pAKD14      | JN106165.1    | uncultured bacterium                          |
| pAKD1       | JN106164.1    | uncultured bacterium                          |
| pADP-1      | NC_004956.1   | <i>Pseudomonas</i> sp. ADP                    |
| pAAA83      | NC_024998.1   | <i>Acidovorax avenae</i> subsp. <i>avenae</i> |
| pA81        | NC_006830.1   | <i>Achromobacter xylosoxidans</i> A8          |
| pA22732-IMP | KJ588780.1    | <i>Achromobacter xylosoxidans</i>             |
| pA1         | NC_007353.2   | <i>Sphingomonas</i> sp. A1                    |
| p712        | NC_019318.1   | <i>Ralstonia pickettii</i>                    |
| p2-T1       | NZ_CP021650.1 | <i>Acidovorax</i> sp. T1                      |
| p14EC001a   | NZ_CP024128.1 | <i>Escherichia coli</i>                       |

---
